# Supplementary material for: Association of C-Type Lectin Mincle with FcεRIβγ Subunits Leads to Functional Activation of RBL-2H3 Cells through Syk
Source: PubMed Central journal article supplement (PMC5385489; doi:10.1038/srep46064), 2017-04-10
Supplement: srep46064-s3.pdf [file srep46064-s3.pdf]

Supplementary Table S1: Syk-regulated genes in Mincle-stimulated RBL-2H3 cells

Manuscript Title: Association of C-Type Lectin Mincle with FcεR1β Subunits Leads to Functional Activation of RBL-2H3 Cells through Syk  
 Authors: Chisato Honjoh, Kazuyasu Chihara, Hatsumi Yoshiki, Shota Yamauchi, Kenji Takeuchi, Yuji Kato, Yukio Hida, Tamotsu Ishizuka & Kiyonao Sada

| Affymetrix Rat Gene 1.0 ST array | R406 treatment Stimulation with anti-myc | -         | +          | +            | Fold Change (Mincle-stimulated cells / Control cells) | P-Value (Unpaired two-tailed Student's t-test) | Gene Accession    |
|----------------------------------|------------------------------------------|-----------|------------|--------------|-------------------------------------------------------|------------------------------------------------|-------------------|
|                                  |                                          |           |            |              |                                                       |                                                |                   |
| 10868940                         | Nra3                                     | 0         | 4.9325495  | 0.09886527   | 30.538834                                             | 1.33E-04                                       | NM_031628         |
| 10742668                         | Ii3                                      | 0         | 4.7208233  | -1.2459137   | 26.369957                                             | 4.61E-04                                       | NM_031513         |
| 10745553                         | Ccl1                                     | 0         | 4.499278   | 0.4850123    | 22.616096                                             | 1.64E-04                                       | NM_001191092      |
| 10758440                         | Ii1                                      | 0         | 4.0546517  | -0.21935463  | 16.617733                                             | 0.001842512                                    | ENSRNOT0000038573 |
| 10742612                         | Ii3                                      | 0         | 3.879614   | -1.2929552   | 14.291262                                             | 2.88E-04                                       | NM_053828         |
| 10781337                         | Egr3                                     | -2.88E-07 | 3.6821694  | -0.27088523  | 12.836409                                             | 1.06E-04                                       | NM_017086         |
| 10743607                         | Ii4                                      | 2.88E-07  | 2.9995543  | -1.0710018   | 7.947792                                              | 7.42E-05                                       | NM_201270         |
| 10736702                         | Ccl7                                     | 0         | 2.934307   | -0.4518478   | 7.6438904                                             | 0.002205499                                    | NM_01007612       |
| 10859095                         | Kirhl1c                                  | -2.88E-07 | 2.6401315  | -0.5940034   | 6.233886                                              | 0.014422675                                    | NM_001085403      |
| 10800919                         | Egr1                                     | 0         | 2.4998674  | -0.9031749   | 5.6563344                                             | 1.95E-04                                       | NM_012551         |
| 10832802                         | Egr2                                     | -2.88E-07 | 2.4518256  | -0.1738514   | 5.471081                                              | 6.81E-04                                       | NM_053633         |
| 10786028                         | Gpr183                                   | 0         | 2.408174   | 0.049978256  | 5.368021                                              | 8.76E-06                                       | NM_001109386      |
| 10904161                         | Sla                                      | -4.77E-07 | 2.4073253  | -1.0554867   | 5.3049006                                             | 8.93E-05                                       | NM_178907         |
| 10705880                         | Nkbid                                    | -2.88E-07 | 2.3632846  | -0.3055308   | 5.145406                                              | 0.004368244                                    | ENSRNOT0000029719 |
| 10774247                         | RGD1309870                               | -2.88E-07 | 2.3291078  | 0.333236     | 5.0249457                                             | 5.44E-04                                       | NM_001166018      |
| 10934608                         | Tlr13                                    | -2.88E-07 | 2.302559   | -0.4188137   | 4.933321                                              | 0.003578564                                    | ENSRNOT0000038868 |
| 10761341                         | Rahgef1                                  | 4.77E-07  | 2.2191901  | -0.2434348   | 4.656318                                              | 0.002270015                                    | NM_01108333       |
| 10793945                         | Ii9                                      | 0         | 2.1885424  | -0.085608    | 4.588447                                              | 0.00105747                                     | NM_001105747      |
| 10806709                         | Zswim4                                   | 2.88E-07  | 2.1008625  | -0.05774665  | 4.289657                                              | 8.10E-04                                       | NM_001107163      |
| 10716541                         |                                          | 0         | 2.0720334  | -0.54671264  | 4.204789                                              | 0.007039595                                    |                   |
| 10828201                         | Tnf                                      | -4.77E-07 | 1.9358268  | -2.1486125   | 3.8259745                                             | 7.43E-04                                       | NM_012675         |
| 10920967                         | Csrnp1                                   | 4.77E-07  | 1.9282355  | -0.7153506   | 3.8058932                                             | 0.00207939                                     | NM_001108786      |
| 10842811                         | Sloc4a1                                  | 0         | 1.867929   | -0.45293856  | 3.622016                                              | 0.001254801                                    | NM_133608         |
| 10815099                         | Hspa41                                   | -4.77E-07 | 1.8325663  | 0.12363863   | 3.5609367                                             | 0.003957082                                    | NM_001106428      |
| 10927780                         | Slc40a1                                  | 0         | 1.7968602  | 0.5015683    | 3.474632                                              | 0.005107452                                    | NM_133315         |
| 10895406                         | Phla1                                    | 4.77E-07  | 1.7708459  | -0.06534914  | 3.4125388                                             | 5.98E-04                                       | NM_017180         |
| 10903166                         | Nab2                                     | 0         | 1.7418189  | -0.33641577  | 3.3445656                                             | 0.011796466                                    | NM_001134874      |
| 10912908                         | Ccl8                                     | 4.77E-07  | 1.686367   | -2.9158247   | 3.218451                                              | 0.001338904                                    | NM_031804         |
| 10773849                         | Osm                                      | 0         | 1.6857553  | -2.3802063   | 3.2170877                                             | 5.36E-04                                       | NM_001006061      |
| 10716524                         | Vom2r3                                   | 2.88E-07  | 1.6663985  | -0.4331863   | 3.1742115                                             | 0.00626888                                     | NM_001099460      |
| 10802619                         |                                          | 0         | 1.6332045  | -0.9216745   | 3.1022104                                             | 0.004717575                                    |                   |
| 10832577                         | Adora2a                                  | -4.77E-07 | 1.577412   | -0.14954662  | 2.9033966                                             | 0.002589401                                    | NM_053294         |
| 10774898                         | Vom2r3                                   | -4.77E-07 | 1.5189528  | -0.2606063   | 2.8658307                                             | 0.006161459                                    | NM_001099460      |
| 10794225                         | Nfil3                                    | -4.77E-07 | 1.4892659  | -0.11667824  | 2.8074617                                             | 0.01508495                                     | NM_053727         |
| 10928524                         | Klf7                                     | 0         | 1.4878764  | -1.0221777   | 2.8047583                                             | 2.64E-04                                       | NM_001108800      |
| 10781467                         | Hlr2a                                    | -4.77E-07 | 1.4848595  | -1.1108181   | 2.7999                                                | 0.005411363                                    | NM_017254         |
| 10774375                         | Pel1                                     | 0         | 1.4579692  | 0.4624462    | 2.7472138                                             | 0.001379865                                    | NM_001100565      |
| 10753582                         | Dcd1d2                                   | 0         | 1.4572992  | -0.17365885  | 2.7459383                                             | 0.005133775                                    | NM_130419         |
| 10871305                         | Test2                                    | 0         | 1.4499755  | 0.38555002   | 2.7320342                                             | 0.001439524                                    | NM_133396         |
| 10860481                         | Sema3a                                   | 4.77E-07  | 1.4180708  | 0.10620499   | 2.6722784                                             | 0.004267392                                    | NM_017310         |
| 10878938                         | Pik3                                     | -4.77E-07 | 1.3704195  | -1.5164146   | 2.5854583                                             | 2.52E-04                                       | NM_022187         |
| 10701620                         | Vom2r3                                   | 2.88E-07  | 1.3436847  | -0.33284426  | 2.5379865                                             | 0.004162272                                    | NM_001099460      |
| 10918288                         | Plekho2                                  | 4.77E-07  | 1.3412924  | 0.022593975  | 2.533781                                              | 0.013500948                                    | ENSRNOT0000042633 |
| 10710333                         | Lyrm1                                    | 4.77E-07  | 1.3317046  | -0.15460682  | 2.516998                                              | 0.001810551                                    | NM_001108918      |
| 10831077                         | Ier3                                     | -4.77E-07 | 1.3045473  | -1.6290231   | 2.470063                                              | 0.003772839                                    | NM_212505         |
| 10826846                         | Sgms2                                    | 0         | 1.3027263  | 0.017515182  | 2.4669461                                             | 0.014566386                                    | NM_001014043      |
| 10887679                         | Vipr2                                    | 0         | 1.2991185  | -0.07885885  | 2.460785                                              | 0.029270492                                    | NM_017238         |
| 10918979                         | Htr1b                                    | 0         | 1.267601   | -0.14498425  | 2.4076087                                             | 0.002132383                                    | NM_022225         |
| 10842525                         | Cas4                                     | 0         | 1.2648666  | -0.3963189   | 2.40275                                               | 0.004793268                                    | NM_001191744      |
| 10707832                         | Chy1                                     | 0         | 1.251255   | -0.37225008  | 2.380484                                              | 4.46E-04                                       | NM_001106268      |
| 10701668                         | Vom2r3                                   | 4.77E-07  | 1.2493533  | -0.47124863  | 2.3771827                                             | 0.02249839                                     | NM_001099460      |
| 10716545                         | Vom2r4                                   | -4.77E-07 | 1.2404251  | -0.12153602  | 2.362682                                              | 0.030438556                                    | NM_001099459      |
| 10725340                         | Deaf1d3                                  | 0         | 1.238215   | -0.4581794   | 2.3590646                                             | 5.90E-04                                       | NM_001024886      |
| 10718643                         | Deaf1d3                                  | 4.77E-07  | 1.2289901  | -0.5500464   | 2.3440278                                             | 9.84E-04                                       | NM_001024886      |
| 10765639                         | Deaf1                                    | 4.77E-07  | 1.2283406  | -1.0013037   | 2.3429728                                             | 0.004074795                                    | NM_001109078      |
| 10896793                         | Trib1                                    | 0         | 1.2209055  | -0.3131598   | 2.3399298                                             | 0.01118884                                     | NM_023985         |
| 10701674                         | Vom2r3                                   | 0         | 1.214638   | -0.18186331  | 2.3208253                                             | 0.0050525703                                   | NM_001099460      |
| 10895144                         | Dusp6                                    | 0         | 1.2084899  | -2.1528935   | 2.3109562                                             | 0.007207021                                    | NM_053883         |
| 10724331                         | Hbc1                                     | 0         | 1.196207   | 0.12960696   | 2.2913647                                             | 0.03112525                                     | NM_001108890      |
| 10795233                         | Btm2a2                                   | 0         | 1.1906886  | -0.05354575  | 2.2826166                                             | 0.001303317                                    | ENSRNOT0000059403 |
| 10773853                         | Lif                                      | -4.77E-07 | 1.1892977  | -1.6151571   | 2.2804177                                             | 8.84E-04                                       | NM_022196         |
| 10795602                         | Map3k8                                   | 0         | 1.1761689  | -0.34075975  | 2.259759                                              | 0.002780803                                    | NM_053847         |
| 10853819                         | Met                                      | 0         | 1.1568885  | -0.19596609  | 2.2297602                                             | 0.013649616                                    | NM_031517         |
| 10915483                         | S1pr2                                    | 0         | 1.1503353  | -0.15996003  | 2.2196548                                             | 0.015214769                                    | NM_017192         |
| 10905777                         |                                          | -4.77E-07 | 1.1488423  | -0.23174524  | 2.2173598                                             | 0.001424731                                    |                   |
| 10741814                         | Cpcb4                                    | -4.77E-07 | 1.1432257  | -0.7681546   | 2.2087438                                             | 0.036605664                                    | NM_001106992      |
| 10862867                         | Gadd45a                                  | 4.77E-07  | 1.1412854  | 0.38028574   | 2.2057738                                             | 0.001251149                                    | NM_024127         |
| 10776597                         | Nipal1                                   | 4.77E-07  | 1.1377907  | -0.9833331   | 2.2004373                                             | 0.004620031                                    | NM_001106003      |
| 10836588                         | Dhrs9                                    | 0         | 1.1311474  | -0.6889231   | 2.1903286                                             | 4.59E-04                                       | NM_130819         |
| 10750282                         | Sle3a3                                   | 0         | 1.1216276  | 0.027130365  | 2.175923                                              | 0.003320885                                    | NM_053715         |
| 10716080                         | Dusp5                                    | 0         | 1.1119089  | -1.286227    | 2.1613142                                             | 0.02558049                                     | NM_133578         |
| 10815317                         | Foxo1                                    | 0         | 1.0889597  | -0.33165407  | 2.1272058                                             | 0.009971818                                    | NM_001191846      |
| 10799420                         | Ii2ra                                    | -2.88E-07 | 1.0847731  | -0.30642056  | 2.1210423                                             | 0.014802754                                    | NM_013163         |
| 10890866                         | Zfp361                                   | 0         | 1.0750647  | -0.15682032  | 2.1068165                                             | 0.021002445                                    | NM_017172         |
| 10757962                         | As1                                      | 4.77E-07  | 1.0661173  | 0.031046667  | 2.0937915                                             | 0.00210128                                     | NM_021577         |
| 10825403                         | LOC107121                                | -2.88E-07 | 1.0643876  | 0.053402385  | 2.0915716                                             | 0.001065504                                    | BC083570          |
| 10709860                         | Svap70                                   | 0         | 1.0632071  | -0.23444605  | 2.0895715                                             | 0.004323587                                    | NM_001106288      |
| 10816050                         | Map9                                     | 0         | 1.055942   | -0.3938341   | 2.0790753                                             | 0.039657936                                    | NM_001135716      |
| 10867725                         |                                          | 0         | 1.0407252  | 0.31520033   | 2.0572615                                             | 0.014359882                                    |                   |
| 10919041                         | Fam46a                                   | 4.77E-07  | 1.0386152  | -0.13903475  | 2.0542543                                             | 0.003081525                                    | NM_001106844      |
| 10773180                         | Hc3st1                                   | 4.77E-07  | 1.0279508  | -0.7556944   | 2.0391252                                             | 0.009524698                                    | NM_053931         |
| 10763299                         | Phlpp1                                   | 0         | 1.0277071  | -0.13228798  | 2.0387814                                             | 0.022411434                                    | NM_021657         |
| 10872626                         | Gpr3                                     | 2.88E-07  | 1.0102315  | -0.93507504  | 2.0142338                                             | 0.007182448                                    | NM_153727         |
| 10885396                         | Zbtb1                                    | 4.77E-07  | 1.0049253  | -0.104469776 | 2.0068388                                             | 2.42E-04                                       | NM_001004444      |
| 10804562                         | Nid67                                    | 0         | 1.0008407  | -0.2483058   | 2.0011663                                             | 8.02E-04                                       | NM_173126         |
| 10823057                         | Sic7a11                                  | 4.77E-07  | 0.9974408  | 0.4209528    | 1.9964547                                             | 0.015400493                                    | NM_001107673      |
| 10734198                         | Map2k3                                   | 0         | 0.99190664 | 0.05006218   | 1.9888116                                             | 0.009184692                                    | NM_001106674      |
| 10716078                         | Msi1                                     | 4.77E-07  | 0.9864154  | 0.35177326   | 1.9812554                                             | 0.005104128                                    | NM_013160         |
| 10861997                         | Hipk2                                    | 4.77E-07  | 0.9810157  | -0.45638657  | 1.973854                                              | 0.00108642                                     | NM_001108622      |
| 10882567                         | Emi4                                     | 0         | 0.9717965  | -0.33720446  | 1.9612813                                             | 0.020686114                                    | NM_001108008      |
| 10806585                         | Junb                                     | 0         | 0.97050667 | -0.34874105  | 1.9595287                                             | 0.001203466                                    | NM_021836         |
| 10825609                         | Mag3                                     | -4.77E-07 | 0.96478224 | 0.011970043  | 1.9517696                                             | 0.006563899                                    | NM_139084         |
| 10796543                         | Arl5b                                    | 0         | 0.9533014  | -0.056722403 | 1.9362986                                             | 0.024531115                                    | NM_001015031      |
| 10803681                         | Stard4                                   | -2.88E-07 | 0.94677496 | 0.07801652   | 1.9275593                                             | 0.008660453                                    | NM_001106159      |
| 10706297                         | Siglec5                                  | 2.88E-07  | 0.9263468  | 0.09961414   | 1.9004573                                             | 0.02234664                                     | NM_001106249      |
| 10757489                         | Vgf                                      | 0         | 0.9260602  | -0.18228793  | 1.9000801                                             | 0.00208532                                     | NM_030997         |
| 10814149                         |                                          | 0         | 0.92273283 | -0.25832248  | 1.8957028                                             | 0.07489832                                     |                   |
| 10753214                         | Rcan1                                    | 2.88E-07  | 0.92061615 | 0.15190601   | 1.8929222                                             | 0.004513314                                    | NM_155724         |
| 10813969                         | Ank1                                     | 4.77E-07  | 0.9196582  | 0.20155685   | 1.8916664                                             | 8.14E-04                                       | NM_053714         |
| 10714830                         |                                          | -2.88E-07 | 0.91591597 | -0.03062635  | 1.8867669                                             | 0.09139848                                     |                   |
| 10903503                         | Lrrp12                                   | 0         | 0.9158912  | -0.33314395  | 1.8867341                                             | 0.008797685                                    | NM_001134883      |
| 10778021                         | Sle35e4                                  | 4.77E-07  | 0.90315914 | -0.38280926  | 1.870156                                              | 0.007499559                                    | NM_153316         |
| 10700534                         |                                          | 2.88E-07  | 0.901366   | 0.33203864   | 1.8678334                                             | 0.036276683                                    |                   |
| 10802734                         | Smad7                                    | 0         | 0.8982916  | -0.12998343  | 1.8638575                                             | 0.08571728                                     | NM_030858         |
| 10859296                         | Emp1                                     | 0         | 0.89454794 | -0.24846268  | 1.8590273                                             | 0.006510658                                    | NM_012843         |
| 10940599                         |                                          | 0         | 0.8907547  | 0.048259735  | 1.8541458                                             | 0.009906265                                    |                   |
| 10763421                         | Dsl                                      | 4.77E-07  | 0.88763237 | -0.07430172  | 1.8501368                                             | 0.007342219                                    | ENSRNOT0000043890 |
| 10743966                         | Kdml6                                    | 4.77E-07  | 0.8853574  | -0.62315106  | 1.8472215                                             | 0.002865542                                    | NM_001108829      |
| 10709844                         | Wec1                                     | 4.77E-07  | 0.88236046 | 0.041871548  | 1.8433883                                             | 0.005889786                                    | NM_001012742      |
| 10852270                         | Lama5                                    | 0         | 0.8721943  | -0.64424515  | 1.8304448                                             | 0.00694502                                     | NM_001191609      |
| 10804316                         | Mcc                                      | 0         | 0.86693907 | -0.117899703 | 1.8237894                                             | 0.023038065                                    | NM_001170534      |
| 10770892                         | Vom2r65                                  | 2.88E-07  | 0.8636036  | -0.20751595  | 1.8195773                                             | 0.07660235                                     | NM_001099654      |
| 10938137                         |                                          |           |            |              |                                                       |                                                |                   |

|          |              |           |            |              |           |             |                     |
|----------|--------------|-----------|------------|--------------|-----------|-------------|---------------------|
| 10734882 | Per1         | 0         | 0.8449464  | 0.14788628   | 1.796198  | 0.025837686 | NM_001034125        |
| 10758212 | Rilp2        | 0         | 0.844388   | -0.049031496 | 1.7955029 | 0.016049512 | NM_001004205        |
| 10926070 | Yes1         | -4.77E-07 | 0.8425765  | -0.21657228  | 1.7932504 | 0.020310204 | NM_033298           |
| 10853171 | Ptpn12       | -4.77E-07 | 0.83269453 | -0.014745712 | 1.7810092 | 0.002996927 | NM_057115           |
| 10776512 | Ras11b       | -2.38E-07 | 0.83096504 | -0.07863283  | 1.7788746 | 0.023407431 | NM_001002830        |
| 10932582 | Cten5        | -4.77E-07 | 0.8295984  | -0.21761322  | 1.7771912 | 0.019749336 | ENSRNOT00000041437  |
| 10701346 |              | 4.77E-07  | 0.8282342  | 0.5979376    | 1.7755103 | 8.15E-04    |                     |
| 10932584 | Cten5        | 4.77E-07  | 0.82002354 | -0.12306976  | 1.7654343 | 0.018928412 | NM_0017106          |
| 10730855 | Mx1          | 0         | 0.8157997  | 0.29259157   | 1.7602736 | 2.97E-04    | NM_013160           |
| 10745850 | Brip1        | 4.77E-07  | 0.81336594 | 0.042727947  | 1.757306  | 0.016938534 | ENSRNOT00000038829  |
| 10769765 | Fcrl4        | -2.38E-07 | 0.8017509  | 0.13405228   | 1.7432158 | 0.029434    | NM_001100682        |
| 10824965 | Mhl1         | 0         | 0.8005276  | -0.13727224  | 1.7417333 | 0.004709983 | NM_001013913        |
| 10859774 | RGD1309621   | 0         | 0.7980094  | 0.43853283   | 1.7387004 | 0.015615716 | ENSRNOT00000055437  |
| 10736135 |              | -4.77E-07 | 0.79379606 | -0.0835762   | 1.7336307 | 0.00485829  |                     |
| 10822444 | Pdc7a        | 0         | 0.78949165 | 0.19740677   | 1.7284653 | 0.017139798 | NM_031080           |
| 10903558 | Gadd45b      | -4.77E-07 | 0.78672457 | 0.15403461   | 1.7251539 | 0.026840316 | NM_001008321        |
| 10877532 | Tubf15       | 2.38E-07  | 0.78381777 | -0.08370924  | 1.7216806 | 0.002804668 | NM_145765           |
| 10724895 | Lysel        | -2.38E-07 | 0.7817669  | -0.1358316   | 1.7192473 | 4.55E-04    | NM_001106286        |
| 10794599 | Nedd9        | 0         | 0.7799001  | -0.48938513  | 1.7170191 | 0.006490359 | NM_001011922        |
| 10716064 | Mx1          | -4.77E-07 | 0.77983665 | 0.28545856   | 1.7169371 | 4.34E-05    | NM_013160           |
| 10930411 | Tgf1         | -2.38E-07 | 0.77966833 | 0.47177315   | 1.7167364 | 0.001413523 | NM_001015020        |
| 10823538 | Shox2        | 4.77E-07  | 0.7761197  | 0.07427788   | 1.7125181 | 0.015098299 | NM_013028           |
| 10720215 | Zfp36        | 2.38E-07  | 0.77308226 | 0.15575075   | 1.7089167 | 0.07806776  | NM_133290           |
| 10812130 |              | 0         | 0.7711749  | -0.048548937 | 1.7066591 | 0.038890533 |                     |
| 10836849 | Igfa6        | 0         | 0.76252174 | -0.06815338  | 1.6964533 | 0.006381857 | ENSRNOT00000045394  |
| 10701632 |              | 2.38E-07  | 0.7590728  | -0.31227684  | 1.6924022 | 0.08608877  |                     |
| 10764551 | Ptgs2        | -4.77E-07 | 0.75814486 | -0.52142525  | 1.6913149 | 0.005978512 | NM_017232           |
| 10813172 | Egfl0        | -4.77E-07 | 0.7579808  | -0.36955738  | 1.6911227 | 0.019293468 | NM_012951           |
| 10906950 | LOC100361136 | -2.38E-07 | 0.7557807  | 0.37559414   | 1.6885453 | 0.004158025 | XR_085888           |
| 10768814 | Ier5         | 0         | 0.75070656 | -0.2187159   | 1.6826797 | 0.011258075 | NM_001025137        |
| 10726929 | Dusp8        | 2.38E-07  | 0.74478245 | -0.06967592  | 1.6757213 | 0.054401193 | NM_001108510        |
| 10719486 | LOC100363783 | 0         | 0.7413094  | 0.32066846   | 1.6716924 | 0.003810734 | ENSRNOT00000052387  |
| 10866850 | Kras         | 0         | 0.7397196  | -0.37035656  | 1.6698494 | 0.033202924 | NM_031515           |
| 10925468 | Gpr35        | 4.77E-07  | 0.7366953  | -0.57574185  | 1.6663538 | 0.01057476  | NM_001037359        |
| 10827079 | Pdlm5        | 0         | 0.733829   | -0.022446632 | 1.6663071 | 0.002261763 | NM_053326           |
| 10940549 |              | -2.38E-07 | 0.73314095 | -0.66490915  | 1.6623539 | 0.01790312  |                     |
| 10821689 | Ptger4       | 4.77E-07  | 0.73239565 | -0.68566275  | 1.6613951 | 8.35E-05    | NM_032076           |
| 10824918 | Ntkh1        | -4.77E-07 | 0.73213196 | 0.3228097    | 1.6610925 | 0.010792231 | ENSRNOT00000036838  |
| 10876396 | Gba2         | 0         | 0.7307358  | -3.15E-04    | 1.6594852 | 0.0330102   | NM_001013991        |
| 10912218 | Pser1        | 0         | 0.73035526 | 0.01355505   | 1.6590476 | 0.0084901   | NM_057194           |
| 10886278 | Gpr65        | 4.77E-07  | 0.721344   | 0.3145318    | 1.6487167 | 0.00242975  | NM_001106751        |
| 10820126 | Nr2f1        | -4.77E-07 | 0.7182579  | -0.41517448  | 1.6451948 | 0.019260608 | NM_031130           |
| 10904169 | Ndrg1        | -4.77E-07 | 0.7178049  | 0.44944      | 1.6446782 | 0.002887189 | NM_001011991        |
| 10754000 | Cd200r1      | -4.77E-07 | 0.71750927 | -1.2831025   | 1.6443412 | 3.02E-04    | NM_023953           |
| 10902024 | Tmtc3        | 4.77E-07  | 0.7139797  | 0.009732723  | 1.6403222 | 0.02221916  | NM_001135858        |
| 10752665 | Chmp2b       | 0         | 0.7094588  | 0.017634869  | 1.6351906 | 0.022492137 | ENSRNOT00000000904  |
| 10701071 |              | -2.38E-07 | 0.70901084 | -0.09921718  | 1.6346833 | 0.0380401   |                     |
| 10721865 | Ppp1r15a     | 2.38E-07  | 0.7021384  | 0.35774326   | 1.6269143 | 0.005751164 | NM_133546           |
| 10819749 | Tll7         | 4.77E-07  | 0.69988346 | 0.06477547   | 1.6243731 | 0.02266636  | ENSRNOT00000055318  |
| 10863430 | Hk2          | -4.77E-07 | 0.69712496 | -0.68456316  | 1.6212713 | 0.01353044  | NM_012735           |
| 10849294 | Slc30a4      | 0         | 0.6954651  | -0.1634798   | 1.6194065 | 7.57E-06    | NM_172066           |
| 10815436 | Smad9        | 0         | 0.6941943  | 0.31830406   | 1.6179806 | 0.019915177 | NM_138872           |
| 10847308 | Mad4         | 0         | 0.6923275  | 0.17883301   | 1.6158884 | 0.0295863   | NM_053585           |
| 10837412 | Tnks1bp1     | 0         | 0.6921334  | 0.03025508   | 1.6156709 | 0.05130966  | ENSRNOT00000012209  |
| 10734873 |              | -2.38E-07 | 0.6920669  | 0.105294466  | 1.6155968 | 0.09079401  |                     |
| 10766338 | Arhgef3      | 0         | 0.6906328  | -0.29162383  | 1.6139914 | 0.08877322  | NM_001106601        |
| 10714694 | Cd274        | 4.77E-07  | 0.689589   | -0.013155937 | 1.6128235 | 2.24E-04    | NM_001191954        |
| 10762740 | Oasl         | 0         | 0.684669   | -0.08108616  | 1.6073382 | 0.009552515 | NM_001009881        |
| 10913473 | Ehnb1        | 0         | 0.67902941 | -0.74296856  | 1.6010629 | 0.00910381  | NM_017089           |
| 10940558 |              | 4.77E-07  | 0.67410755 | -0.76683813  | 1.5956609 | 0.032510933 |                     |
| 10798160 |              | 0         | 0.6654215  | -0.07574487  | 1.5860316 | 0.050885607 |                     |
| 10814142 |              | 4.77E-07  | 0.6558447  | -0.108500004 | 1.5755377 | 0.015574298 |                     |
| 10822637 | Skil         | 0         | 0.64719915 | -0.19285297  | 1.5661248 | 0.013883356 | ENSRNOT00000013191  |
| 10715841 | Trim8        | 0         | 0.64666295 | 0.13534117   | 1.5655428 | 0.02504168  | NM_001128083        |
| 10782826 | Ero1l        | -4.77E-07 | 0.6446843  | -0.15866566  | 1.5633976 | 1.54E-04    | NM_138528           |
| 10859108 | Clec2g       | -4.77E-07 | 0.6436734  | 0.011838436  | 1.5623026 | 0.001059175 | NM_001048075        |
| 10917707 | RGD1312026   | -4.77E-07 | 0.64037275 | -0.18364573  | 1.5587324 | 0.051284958 | ENSRNOT000000108149 |
| 10903501 | Lrp12        | 4.77E-07  | 0.6392722  | -0.27888155  | 1.5575427 | 0.005018466 | NM_001134883        |
| 10804340 | LOC679154    | -4.77E-07 | 0.63437366 | 0.0810318    | 1.5522642 | 0.031615667 | ENSRNOT00000061278  |
| 10818698 | Cnn3         | 0         | 0.6340232  | -0.054719448 | 1.5518867 | 0.008463636 | NM_019359           |
| 10928529 | Fam119a      | 0         | 0.6304898  | -0.7168679   | 1.5480905 | 0.0140596   | ENSRNOT00000019670  |
| 10866041 | Klrk1        | 0         | 0.63011503 | -1.1594634   | 1.5476884 | 0.029030852 | NM_133512           |
| 10940515 |              | 0         | 0.6251712  | 0.038283348  | 1.5423938 | 0.007984337 |                     |
| 10767489 | Mapkap2      | 4.77E-07  | 0.6248007  | 0.05870533   | 1.5419973 | 7.21E-04    | NM_178102           |
| 10891364 | Alkbh        | 0         | 0.6238642  | 0.06311321   | 1.5409971 | 0.005882509 | NM_001108718        |
| 10711961 | Inpp5a       | 0         | 0.6236677  | -0.22922087  | 1.5407873 | 0.010498088 | NM_001108923        |
| 10838100 | Traf6        | 0         | 0.6216817  | -0.028563976 | 1.5386677 | 0.025047304 | NM_001107754        |
| 10700900 |              | -2.38E-07 | 0.61682034 | 0.13954282   | 1.533492  | 0.047721982 |                     |
| 10774457 | Fam161a      | 4.77E-07  | 0.6147213  | -0.49920964  | 1.5312617 | 0.030527003 | BC079233            |
| 10918545 | Adam10       | -4.77E-07 | 0.61438036 | -0.04753971  | 1.5309008 | 0.09670828  | ENSRNOT00000021066  |
| 10786743 | Ncoa4        | 0         | 0.61271524 | -0.07545471  | 1.5291344 | 0.001849986 | NM_001034007        |
| 10799615 | Fam107b      | 0         | 0.6109772  | 0.024165154  | 1.5272933 | 0.008550175 | BC085116            |
| 10939319 | Armc6        | 0         | 0.6107168  | 0.1730178    | 1.5270177 | 0.031782214 | NM_001007757        |
| 10776361 | RGD1311575   | -4.77E-07 | 0.61053896 | -0.2964003   | 1.52668   | 0.001078888 | ENSRNOT00000029008  |
| 10701949 | RGD1306565   | 4.77E-07  | 0.6087556  | -0.022261143 | 1.5240428 | 0.018004915 | ENSRNOT00000051496  |
| 10918708 | Mapk6        | 4.77E-07  | 0.60850096 | -0.2084412   | 1.5246737 | 0.012404228 | NM_031622           |
| 10920556 | Rtp3         | 0         | 0.6067891  | -0.89390635  | 1.5228661 | 0.011922951 | NM_001108190        |
| 10937584 | Tspyl2       | 0         | 0.6055832  | 0.048692703  | 1.5215937 | 0.05196299  | NM_001191618        |
| 10844452 |              | -2.38E-07 | 0.5969136  | -0.001754761 | 1.5124776 | 0.020289056 |                     |
| 10882543 | Em14         | -4.77E-07 | 0.59653425 | -0.21067047  | 1.5120803 | 0.022464028 | NM_001108908        |
| 10821402 | Pc10         | 4.77E-07  | 0.5961051  | 0.13454533   | 1.5116296 | 0.006580849 | NM_001007634        |
| 10862731 | Kbtbd2       | 4.77E-07  | 0.5948806  | 0.38147068   | 1.510347  | 0.004185607 | NM_001107861        |
| 10841333 | Map1lc3a     | 0         | 0.5943308  | 0.020761967  | 1.5097721 | 0.007142896 | NM_199500           |
| 10752764 | RGD1563888   | 4.77E-07  | 0.5937557  | 0.2925353    | 1.5091699 | 0.006667249 | NM_001108312        |
| 10936853 | Mid1p1       | 4.77E-07  | 0.59317017 | -0.2076745   | 1.5085576 | 0.004716611 | NM_206950           |
| 10776954 | Rcl1         | 0         | 0.5884752  | 0.16922998   | 1.5036567 | 0.003905903 | NM_001113776        |
